# Supplementary material for: Food Allergens in Ultra-Processed Foods According to the NOVA Classification System: A Greek Branded Food Level Analysis
Source: MDPI journal article supplement (doi:10.3390/nu15122767), 2023-06-16
Supplement: s1 [file s1]

Table S1 Prevalence of the 14 allergens in branded foods per NOVA Group of each food subcategory.

| Food Subcategory               | NOVA Group    | Milk        | Gluten    | Soy       | Eggs       | Nuts       | Peanuts | Sesame    | Mustard  | Sulphites | Fish    | Crustaceans | Mollusks | Celery   | Lupin   |
|--------------------------------|---------------|-------------|-----------|-----------|------------|------------|---------|-----------|----------|-----------|---------|-------------|----------|----------|---------|
| Milk (n=171)                   | NOVA1 (n=94)  | 94 (100.0)  | 0 (0.0)   | 0 (0.0)   | 0 (0.0)    | 0 (0.0)    | 0 (0.0) | 0 (0.0)   | 0 (0.0)  | 0 (0.0)   | 0 (0.0) | 0 (0.0)     | 0 (0.0)  | 0 (0.0)  | 0 (0.0) |
|                                | NOVA3 (n=6)   | 6 (100.0)   | 0 (0.0)   | 0 (0.0)   | 0 (0.0)    | 0 (0.0)    | 0 (0.0) | 0 (0.0)   | 0 (0.0)  | 0 (0.0)   | 0 (0.0) | 0 (0.0)     | 0 (0.0)  | 0 (0.0)  | 0 (0.0) |
|                                | NOVA4 (n=71)  | 71 (100.0)  | 0 (0.0)   | 3 (4.2)   | 0 (0.0)    | 0 (0.0)    | 0 (0.0) | 0 (0.0)   | 0 (0.0)  | 0 (0.0)   | 0 (0.0) | 0 (0.0)     | 0 (0.0)  | 0 (0.0)  | 0 (0.0) |
| Yogurt (n=168)                 | NOVA1 (n=46)  | 46 (100.0)  | 0 (0.0)   | 0 (0.0)   | 0 (0.0)    | 0 (0.0)    | 0 (0.0) | 0 (0.0)   | 0 (0.0)  | 0 (0.0)   | 0 (0.0) | 0 (0.0)     | 0 (0.0)  | 0 (0.0)  | 0 (0.0) |
|                                | NOVA4 (n=122) | 122 (100.0) | 32 (26.2) | 10 (8.2)  | 11 (9.0)   | 21 (17.2)  | 7 (5.7) | 10 (8.2)  | 0 (0.0)  | 0 (0.0)   | 0 (0.0) | 0 (0.0)     | 0 (0.0)  | 0 (0.0)  | 1 (0.8) |
| Cheese (n=209)                 | NOVA3 (n=124) | 124 (100.0) | 0 (0.0)   | 0 (0.0)   | 0 (0.0)    | 0 (0.0)    | 0 (0.0) | 0 (0.0)   | 0 (0.0)  | 0 (0.0)   | 0 (0.0) | 0 (0.0)     | 0 (0.0)  | 0 (0.0)  | 0 (0.0) |
|                                | NOVA4 (n=85)  | 85 (100.0)  | 4 (4.7)   | 3 (3.5)   | 7 (8.2)    | 0 (0.0)    | 0 (0.0) | 0 (0.0)   | 4 (4.7)  | 5 (5.9)   | 1 (1.2) | 0 (0.0)     | 0 (0.0)  | 4 (4.7)  | 0 (0.0) |
| Milk Substitute (n=334)        | NOVA1 (n=6)   | 0 (0.0)     | 1 (16.7)  | 3 (50.0)  | 0 (0.0)    | 3 (50.0)   | 0 (0.0) | 0 (0.0)   | 0 (0.0)  | 0 (0.0)   | 0 (0.0) | 0 (0.0)     | 0 (0.0)  | 0 (0.0)  | 0 (0.0) |
|                                | NOVA3 (n=37)  | 0 (0.0)     | 13 (35.1) | 7 (18.9)  | 0 (0.0)    | 15 (40.5)  | 0 (0.0) | 0 (0.0)   | 0 (0.0)  | 0 (0.0)   | 0 (0.0) | 0 (0.0)     | 0 (0.0)  | 0 (0.0)  | 0 (0.0) |
|                                | NOVA4 (n=291) | 14 (4.8)    | 56 (19.2) | 80 (27.5) | 8 (2.7)    | 146 (50.2) | 7 (2.4) | 31 (10.7) | 16 (5.5) | 0 (0.0)   | 0 (0.0) | 0 (0.0)     | 0 (0.0)  | 16 (5.5) | 0 (0.0) |
| Milk Cream (n=40)              | NOVA4 (n=40)  | 40 (100.0)  | 0 (0.0)   | 2 (5.0)   | 0 (0.0)    | 0 (0.0)    | 0 (0.0) | 0 (0.0)   | 0 (0.0)  | 0 (0.0)   | 0 (0.0) | 0 (0.0)     | 0 (0.0)  | 0 (0.0)  | 0 (0.0) |
| Dairy Dessert (n=43)           | NOVA4 (n=43)  | 41 (95.3)   | 22 (51.2) | 33 (76.7) | 24 (55.8)  | 35 (81.4)  | 0 (0.0) | 4 (9.3)   | 0 (0.0)  | 0 (0.0)   | 0 (0.0) | 0 (0.0)     | 0 (0.0)  | 0 (0.0)  | 0 (0.0) |
| Fresh or processed eggs (n=35) | NOVA1 (n=34)  | 3 (8.8)     | 3 (8.8)   | 3 (8.8)   | 34 (100.0) | 3 (8.8)    | 0 (0.0) | 0 (0.0)   | 0 (0.0)  | 0 (0.0)   | 0 (0.0) | 0 (0.0)     | 0 (0.0)  | 0 (0.0)  | 0 (0.0) |
|                                | NOVA4 (n=1)   | 0 (0.0)     | 0 (0.0)   | 0 (0.0)   | 1 (100.0)  | 0 (0.0)    | 0 (0.0) | 0 (0.0)   | 0 (0.0)  | 0 (0.0)   | 0 (0.0) | 0 (0.0)     | 0 (0.0)  | 0 (0.0)  | 0 (0.0) |
| Egg imitation (n=1)            | NOVA4 (n=1)   | 0 (0.0)     | 0 (0.0)   | 1 (100.0) | 0 (0.0)    | 0 (0.0)    | 0 (0.0) | 1 (100.0) | 1 (100)  | 0 (0.0)   | 0 (0.0) | 0 (0.0)     | 0 (0.0)  | 1 (100)  | 0 (0.0) |
| Poultry meat (n=2)             | NOVA4 (n=2)   | 2 (100.0)   | 0 (0.0)   | 0 (0.0)   | 0 (0.0)    | 0 (0.0)    | 0 (0.0) | 0 (0.0)   | 0 (0.0)  | 0 (0.0)   | 0 (0.0) | 0 (0.0)     | 0 (0.0)  | 0 (0.0)  | 0 (0.0) |

|                                                               |               |            |            |           |           |           |           |           |           |           |           |         |          |           |         |
|---------------------------------------------------------------|---------------|------------|------------|-----------|-----------|-----------|-----------|-----------|-----------|-----------|-----------|---------|----------|-----------|---------|
| Meat analogue (n=110)                                         | NOVA4 (n=110) | 0 (0.0)    | 70 (63.6)  | 60 (54.5) | 3 (2.7)   | 10 (9.1)  | 0 (0.0)   | 18 (16.4) | 43 (39.1) | 3 (2.7)   | 0 (0.0)   | 0 (0.0) | 0 (0.0)  | 39 (35.5) | 4 (3.6) |
| Preserved meat (n=82)                                         | NOVA1 (n=1)   | 1 (100.0)  | 0 (0.0)    | 1 (100.0) | 1 (100.0) | 1 (100.0) | 1 (100)   | 0 (0.0)   | 1 (100)   | 1 (100)   | 0 (0.0)   | 0 (0.0) | 0 (0.0)  | 1 (100)   | 0 (0.0) |
|                                                               | NOVA3 (n=2)   | 0 (0.0)    | 0 (0.0)    | 0 (0.0)   | 0 (0.0)   | 0 (0.0)   | 0 (0.0)   | 0 (0.0)   | 0 (0.0)   | 0 (0.0)   | 0 (0.0)   | 0 (0.0) | 0 (0.0)  | 0 (0.0)   | 0 (0.0) |
|                                                               | NOVA4 (n=79)  | 54 (68.4)  | 17 (21.5)  | 56 (70.9) | 29 (36.7) | 41 (51.9) | 10 (12.7) | 1 (1.3)   | 57 (72.2) | 28 (35.4) | 0 (0.0)   | 0 (0.0) | 0 (0.0)  | 52 (65.8) | 0 (0.0) |
| Sausage or similar meat (n=37)                                | NOVA4 (n=37)  | 21 (56.8)  | 6 (16.2)   | 20 (54.1) | 13 (35.1) | 11 (29.7) | 5 (13.5)  | 0 (0.0)   | 20 (54.1) | 12 (32.4) | 0 (0.0)   | 0 (0.0) | 0 (0.0)  | 19 (51.4) | 0 (0.0) |
| Meat dish (n=17)                                              | NOVA4 (n=17)  | 15 (88.2)  | 15 (88.2)  | 5 (29.4)  | 5 (29.4)  | 1 (5.9)   | 1 (5.9)   | 0 (0.0)   | 8 (47.1)  | 0 (0.0)   | 0 (0.0)   | 0 (0.0) | 0 (0.0)  | 2 (11.8)  | 0 (0.0) |
| Seafood product (n=78)                                        | NOVA3 (n=52)  | 0 (0.0)    | 1 (1.9)    | 2 (3.8)   | 0 (0.0)   | 0 (0.0)   | 0 (0.0)   | 0 (0.0)   | 0 (0.0)   | 0 (0.0)   | 50 (96.2) | 1 (1.9) | 2 (3.8)  | 3 (5.8)   | 0 (0.0) |
|                                                               | NOVA4 (n=26)  | 2 (7.7)    | 9 (34.6)   | 2 (7.7)   | 1 (3.8)   | 0 (0.0)   | 0 (0.0)   | 0 (0.0)   | 2 (7.7)   | 2 (7.7)   | 19 (73.1) | 1 (3.8) | 9 (34.6) | 1 (3.8)   | 0 (0.0) |
| Vegetable fat or oil (n=8)                                    | NOVA2 (n=1)   | 0 (0.0)    | 0 (0.0)    | 0 (0.0)   | 0 (0.0)   | 0 (0.0)   | 0 (0.0)   | 0 (0.0)   | 0 (0.0)   | 0 (0.0)   | 0 (0.0)   | 0 (0.0) | 0 (0.0)  | 0 (0.0)   | 0 (0.0) |
|                                                               | NOVA4 (n=7)   | 3 (42.9)   | 0 (0.0)    | 0 (0.0)   | 0 (0.0)   | 0 (0.0)   | 0 (0.0)   | 0 (0.0)   | 0 (0.0)   | 0 (0.0)   | 0 (0.0)   | 0 (0.0) | 0 (0.0)  | 0 (0.0)   | 0 (0.0) |
| Margarine or lipid of mixed origins (n=39)                    | NOVA4 (n=39)  | 33 (84.6)  | 0 (0.0)    | 1 (2.6)   | 0 (0.0)   | 0 (0.0)   | 0 (0.0)   | 0 (0.0)   | 0 (0.0)   | 0 (0.0)   | 0 (0.0)   | 0 (0.0) | 0 (0.0)  | 0 (0.0)   | 0 (0.0) |
| Butter or other animal fat (n=34)                             | NOVA2 (n=32)  | 32 (100.0) | 0 (0.0)    | 0 (0.0)   | 0 (0.0)   | 0 (0.0)   | 0 (0.0)   | 0 (0.0)   | 0 (0.0)   | 0 (0.0)   | 0 (0.0)   | 0 (0.0) | 0 (0.0)  | 0 (0.0)   | 0 (0.0) |
|                                                               | NOVA4 (n=2)   | 2 (100.0)  | 0 (0.0)    | 0 (0.0)   | 0 (0.0)   | 0 (0.0)   | 0 (0.0)   | 0 (0.0)   | 0 (0.0)   | 0 (0.0)   | 0 (0.0)   | 0 (0.0) | 0 (0.0)  | 0 (0.0)   | 0 (0.0) |
| Cereal or cereal-like milling products and derivatives (n=51) | NOVA4 (n=51)  | 36 (70.6)  | 51 (100.0) | 27 (52.9) | 35 (68.6) | 15 (29.4) | 4 (7.8)   | 21 (41.2) | 16 (31.4) | 1 (2.0)   | 1 (2.0)   | 1 (2.0) | 1 (2.0)  | 5 (9.8)   | 0 (0.0) |
| Rice or other grain (n=97)                                    | NOVA1 (n=64)  | 0 (0.0)    | 3 (4.7)    | 1 (1.6)   | 1 (1.6)   | 5 (7.8)   | 5 (7.8)   | 5 (7.8)   | 0 (0.0)   | 0 (0.0)   | 0 (0.0)   | 0 (0.0) | 0 (0.0)  | 0 (0.0)   | 0 (0.0) |

|                                    |               |            |            |            |            |            |           |            |           |          |          |          |         |           |          |
|------------------------------------|---------------|------------|------------|------------|------------|------------|-----------|------------|-----------|----------|----------|----------|---------|-----------|----------|
|                                    | NOVA3 (n=2)   | 0 (0.0)    | 0          | 0 (0.0)    | 0 (0.0)    | 0 (0.0)    | 0 (0.0)   | 0 (0.0)    | 0 (0.0)   | 0 (0.0)  | 0 (0.0)  | 0 (0.0)  | 0 (0.0) | 0 (0.0)   | 0 (0.0)  |
|                                    | NOVA4 (n=31)  | 19 (61.3)  | 28 (90.3)  | 22 (71.0)  | 21 (67.7)  | 0 (0.0)    | 5 (16.1)  | 13 (41.9)  | 19 (61.3) | 0 (0.0)  | 7 (22.6) | 3 (9.7)  | 1 (3.2) | 19 (61.3) | 7 (22.6) |
| Pasta and similar products (n=200) | NOVA1 (n=165) | 14 (8.5)   | 262 (98.2) | 64 (38.8)  | 52 (31.5)  | 1 (0.6)    | 1 (0.6)   | 1 (0.6)    | 1 (0.6)   | 0 (0.0)  | 0 (0.0)  | 0 (0.0)  | 0 (0.0) | 1 (0.6)   | 1 (0.6)  |
|                                    | NOVA3 (n=9)   | 8 (88.9)   | 9 (100.0)  | 0 (0.0)    | 6 (66.7)   | 0 (0.0)    | 0 (0.0)   | 3 (33.3)   | 0 (0.0)   | 0 (0.0)  | 1 (11.1) | 1 (11.1) | 0 (0.0) | 0 (0.0)   | 0 (0.0)  |
|                                    | NOVA4 (n=26)  | 20 (76.9)  | 22 (84.6)  | 11 (42.3)  | 19 (73.1)  | 0 (0.0)    | 0 (0.0)   | 0 (0.0)    | 1 (3.8)   | 0 (0.0)  | 0 (0.0)  | 0 (0.0)  | 0 (0.0) | 1 (3.8)   | 3 (11.5) |
| Breakfast cereals (n=149)          | NOVA1 (n=4)   | 1 (25.0)   | 4 (100.0)  | 4 (100.0)  | 0 (0.0)    | 1 (25.0)   | 0 (0.0)   | 1 (25.0)   | 0 (0.0)   | 1 (25.0) | 0 (0.0)  | 0 (0.0)  | 0 (0.0) | 0 (0.0)   | 0 (0.0)  |
|                                    | NOVA3 (n=1)   | 0 (0.0)    | 1 (100.0)  | 1 (100.0)  | 0 (0.0)    | 1 (100.0)  | 1 (100)   | 0 (0.0)    | 0 (0.0)   | 0 (0.0)  | 0 (0.0)  | 0 (0.0)  | 0 (0.0) | 0 (0.0)   | 0 (0.0)  |
|                                    | NOVA4 (n=144) | 117 (81.3) | 135 (93.8) | 94 (65.3)  | 3 (2.1)    | 112 (77.8) | 56 (38.9) | 26 (18.1)  | 2 (1.4)   | 12 (8.3) | 0 (0.0)  | 0 (0.0)  | 0 (0.0) | 0 (0.0)   | 2 (1.4)  |
| Bread and similar products (n=242) | NOVA4 (n=242) | 120 (49.6) | 238 (98.3) | 73 (30.2)  | 88 (36.4)  | 47 (19.4)  | 4 (1.7)   | 149 (61.6) | 4 (1.7)   | 4 (1.7)  | 0 (0.0)  | 0 (0.0)  | 0 (0.0) | 2 (0.8)   | 3 (1.2)  |
| Fine bakery ware (n=279)           | NOVA4 (n=279) | 240 (86.0) | 277 (99.3) | 215 (77.1) | 197 (70.6) | 217 (77.8) | 68 (24.4) | 146 (52.3) | 5 (1.8)   | 20 (7.2) | 0 (0.0)  | 0 (0.0)  | 0 (0.0) | 5 (1.8)   | 20 (7.2) |
| Savory cereal dish (n=86)          | NOVA4 (n=86)  | 85 (98.8)  | 86 (100.0) | 45 (52.3)  | 66 (76.7)  | 37 (43.0)  | 2 (2.3)   | 65 (75.6)  | 40 (46.5) | 2 (2.3)  | 2 (2.3)  | 0 (0.0)  | 0 (0.0) | 24 (27.9) | 1 (1.2)  |
| Nuts (n=65)                        | NOVA1 (n=20)  | 0 (0.0)    | 19 (95.0)  | 1 (5)      | 0 (0.0)    | 20 (100.0) | 18 (90.0) | 13 (65.0)  | 0 (0.0)   | 0 (0.0)  | 0 (0.0)  | 0 (0.0)  | 0 (0.0) | 0 (0.0)   | 0 (0.0)  |
|                                    | NOVA3 (n=14)  | 0 (0.0)    | 10 (71.4)  | 0 (0.0)    | 0 (0.0)    | 13 (92.9)  | 14 (100)  | 10 (71.4)  | 0 (0.0)   | 0 (0.0)  | 0 (0.0)  | 0 (0.0)  | 0 (0.0) | 0 (0.0)   | 0 (0.0)  |
|                                    | NOVA4 (n=31)  | 4 (12.9)   | 28 (90.3)  | 5 (16.1)   | 0 (0.0)    | 31 (100.0) | 30 (96.8) | 21 (67.7)  | 1 (3.2)   | 4 (12.9) | 0 (0.0)  | 0 (0.0)  | 0 (0.0) | 0 (0.0)   | 0 (0.0)  |
| Seeds and kernels (n=35)           | NOVA3 (n=18)  | 0 (0.0)    | 0 (0.0)    | 0 (0.0)    | 0 (0.0)    | 0 (0.0)    | 0 (0.0)   | 0 (0.0)    | 0 (0.0)   | 0 (0.0)  | 0 (0.0)  | 0 (0.0)  | 0 (0.0) | 0 (0.0)   | 0 (0.0)  |
|                                    | NOVA4 (n=17)  | 1 (5.9)    | 0 (0.0)    | 0 (0.0)    | 0 (0.0)    | 2 (11.8)   | 0 (0.0)   | 0 (0.0)    | 0 (0.0)   | 0 (0.0)  | 0 (0.0)  | 0 (0.0)  | 0 (0.0) | 0 (0.0)   | 0 (0.0)  |
| Nut or seed product (n=27)         | NOVA1 (n=9)   | 0 (0.0)    | 0 (0.0)    | 0 (0.0)    | 0 (0.0)    | 0 (0.0)    | 0 (0.0)   | 9 (100.0)  | 0 (0.0)   | 0 (0.0)  | 0 (0.0)  | 0 (0.0)  | 0 (0.0) | 0 (0.0)   | 0 (0.0)  |

|                                             |                  |           |            |           |          |           |          |           |         |           |         |         |         |          |         |
|---------------------------------------------|------------------|-----------|------------|-----------|----------|-----------|----------|-----------|---------|-----------|---------|---------|---------|----------|---------|
|                                             | NOVA4<br>(n=18)  | 3 (16.7)  | 8 (44.4)   | 6 (33.3)  | 0 (0.0)  | 5 (27.8)  | 4 (22.2) | 16 (88.9) | 0 (0.0) | 3 (16.7)  | 0 (0.0) | 0 (0.0) | 0 (0.0) | 0 (0.0)  | 0 (0.0) |
| Vegetable<br>(excluding<br>potato) (n=170)  | NOVA1<br>(n=65)  | 0 (0.0)   | 0 (0.0)    | 0 (0.0)   | 0 (0.0)  | 0 (0.0)   | 0 (0.0)  | 0 (0.0)   | 0 (0.0) | 0 (0.0)   | 0 (0.0) | 0 (0.0) | 0 (0.0) | 1 (1.5)  | 0 (0.0) |
|                                             | NOVA3<br>(n=35)  | 1 (2.9)   | 0 (0.0)    | 0 (0.0)   | 0 (0.0)  | 1 (2.9)   | 0 (0.0)  | 0 (0.0)   | 1 (2.9) | 1 (2.9)   | 0 (0.0) | 0 (0.0) | 0 (0.0) | 0 (0.0)  | 0 (0.0) |
|                                             | NOVA4<br>(n=70)  | 3 (4.3)   | 1 (1.4)    | 0 (0.0)   | 0 (0.0)  | 0 (0.0)   | 0 (0.0)  | 0 (0.0)   | 0 (0.0) | 4 (5.7)   | 0 (0.0) | 0 (0.0) | 0 (0.0) | 2 (2.9)  | 0 (0.0) |
| Starchy root or<br>potato (n=21)            | NOVA1<br>(n=1)   | 0 (0.0)   | 0 (0.0)    | 0 (0.0)   | 0 (0.0)  | 0 (0.0)   | 0 (0.0)  | 0 (0.0)   | 0 (0.0) | 0 (0.0)   | 0 (0.0) | 0 (0.0) | 0 (0.0) | 0 (0.0)  | 0 (0.0) |
|                                             | NOVA3<br>(n=2)   | 0 (0.0)   | 0 (0.0)    | 0 (0.0)   | 0 (0.0)  | 0 (0.0)   | 0 (0.0)  | 0 (0.0)   | 0 (0.0) | 0 (0.0)   | 0 (0.0) | 0 (0.0) | 0 (0.0) | 0 (0.0)  | 0 (0.0) |
|                                             | NOVA4<br>(n=18)  | 10 (55.6) | 6 (33.3)   | 0 (0.0)   | 3 (16.7) | 0 (0.0)   | 0 (0.0)  | 0 (0.0)   | 0 (0.0) | 5 (27.8)  | 0 (0.0) | 0 (0.0) | 0 (0.0) | 3 (16.7) | 0 (0.0) |
| Pulse and<br>pulse product<br>(n=341)       | NOVA1<br>(n=341) | 0 (0.0)   | 122 (35.8) | 79 (23.2) | 0 (0.0)  | 90 (26.4) | 12 (3.5) | 81 (23.8) | 0 (0.0) | 0 (0.0)   | 0 (0.0) | 0 (0.0) | 0 (0.0) | 5 (1.5)  | 0 (0.0) |
| Processed food<br>product (fruit)<br>(n=42) | NOVA1<br>(n=1)   | 0 (0.0)   | 0 (0.0)    | 0 (0.0)   | 0 (0.0)  | 0 (0.0)   | 0 (0.0)  | 0 (0.0)   | 0 (0.0) | 1 (100)   | 0 (0.0) | 0 (0.0) | 0 (0.0) | 0 (0.0)  | 0 (0.0) |
|                                             | NOVA3<br>(n=5)   | 0 (0.0)   | 0 (0.0)    | 0 (0.0)   | 0 (0.0)  | 0 (0.0)   | 0 (0.0)  | 0 (0.0)   | 0 (0.0) | 0 (0.0)   | 0 (0.0) | 0 (0.0) | 0 (0.0) | 0 (0.0)  | 0 (0.0) |
|                                             | NOVA4<br>(n=36)  | 0 (0.0)   | 4 (11.1)   | 0 (0.0)   | 0 (0.0)  | 4 (11.1)  | 4 (11.1) | 2 (5.6)   | 0 (0.0) | 15 (41.7) | 0 (0.0) | 0 (0.0) | 0 (0.0) | 0 (0.0)  | 0 (0.0) |
| Sugar, honey,<br>or syrup<br>(n=46)         | NOVA1<br>(n=1)   | 0 (0.0)   | 0 (0.0)    | 0 (0.0)   | 0 (0.0)  | 0 (0.0)   | 0 (0.0)  | 0 (0.0)   | 0 (0.0) | 0 (0.0)   | 0 (0.0) | 0 (0.0) | 0 (0.0) | 0 (0.0)  | 0 (0.0) |
|                                             | NOVA2<br>(n=35)  | 0 (0.0)   | 0 (0.0)    | 0 (0.0)   | 0 (0.0)  | 0 (0.0)   | 0 (0.0)  | 0 (0.0)   | 0 (0.0) | 0 (0.0)   | 0 (0.0) | 0 (0.0) | 0 (0.0) | 0 (0.0)  | 0 (0.0) |
|                                             | NOVA3<br>(n=6)   | 0 (0.0)   | 0 (0.0)    | 0 (0.0)   | 0 (0.0)  | 0 (0.0)   | 0 (0.0)  | 0 (0.0)   | 0 (0.0) | 0 (0.0)   | 0 (0.0) | 0 (0.0) | 0 (0.0) | 0 (0.0)  | 0 (0.0) |
|                                             | NOVA4<br>(n=4)   | 0 (0.0)   | 0          | 0 (0.0)   | 0 (0.0)  | 0 (0.0)   | 0 (0.0)  | 0 (0.0)   | 0 (0.0) | 0 (0.0)   | 0 (0.0) | 0 (0.0) | 0 (0.0) | 0 (0.0)  | 0 (0.0) |
| Jam or<br>marmalade<br>(n=83)               | NOVA4<br>(n=83)  | 3 (6.5)   | 11 (13.3)  | 0 (0.0)   | 1 (1.2)  | 1 (1.2)   | 0 (0.0)  | 0 (0.0)   | 0 (0.0) | 4 (4.8)   | 0 (0.0) | 0 (0.0) | 0 (0.0) | 0 (0.0)  | 0 (0.0) |
| Non-chocolate<br>confectionery              | NOVA3<br>(n=22)  | 0 (0.0)   | 0 (0.0)    | 0 (0.0)   | 0 (0.0)  | 9 (40.9)  | 6 (27.3) | 8 (36.4)  | 0 (0.0) | 1 (4.5)   | 0 (0.0) | 0 (0.0) | 0 (0.0) | 0 (0.0)  | 0 (0.0) |

|                                              |               |             |            |            |           |            |           |           |           |           |           |          |           |           |          |
|----------------------------------------------|---------------|-------------|------------|------------|-----------|------------|-----------|-----------|-----------|-----------|-----------|----------|-----------|-----------|----------|
| or other sugar product (n=68)                | NOVA4 (n=46)  | 3 (6.5)     | 3 (6.5)    | 3 (6.5)    | 5 (10.9)  | 36 (78.3)  | 29 (63.0) | 34 (73.9) | 0 (0.0)   | 10 (21.7) | 0 (0.0)   | 0 (0.0)  | 0 (0.0)   | 0 (0.0)   | 0 (0.0)  |
| Chocolate or chocolate product (n=207)       | NOVA4 (n=207) | 207 (100.0) | 161 (77.8) | 185 (89.4) | 28 (13.5) | 196 (94.7) | 76 (36.7) | 14 (6.8)  | 0 (0.0)   | 6 (2.9)   | 0 (0.0)   | 0 (0.0)  | 0 (0.0)   | 0 (0.0)   | 0 (0.0)  |
| Juice or nectar (n=163)                      | NOVA1 (n=48)  | 0           | 0 (0.0)    | 0 (0.0)    | 0 (0.0)   | 0 (0.0)    | 0 (0.0)   | 0 (0.0)   | 0 (0.0)   | 0 (0.0)   | 0 (0.0)   | 0 (0.0)  | 0 (0.0)   | 0 (0.0)   | 0 (0.0)  |
|                                              | NOVA3 (n=1)   | 0 (0.0)     | 0 (0.0)    | 0 (0.0)    | 0 (0.0)   | 0 (0.0)    | 0 (0.0)   | 0 (0.0)   | 0 (0.0)   | 0 (0.0)   | 0 (0.0)   | 0 (0.0)  | 0 (0.0)   | 1 (100)   | 0 (0.0)  |
|                                              | NOVA4 (n=114) | 0 (0.0)     | 0          | 0          | 0 (0.0)   | 0 (0.0)    | 0 (0.0)   | 0 (0.0)   | 0 (0.0)   | 2 (1.8)   | 0 (0.0)   | 0 (0.0)  | 0 (0.0)   | 0 (0.0)   | 0 (0.0)  |
| Non-alcoholic beverage (n=283)               | NOVA4 (n=283) | 15 (5.3)    | 5 (1.8)    | 14 (4.9)   | 0 (0.0)   | 3 (1.1)    | 1 (0.4)   | 1 (0.4)   | 0 (0.0)   | 0 (0.0)   | 0 (0.0)   | 0 (0.0)  | 0 (0.0)   | 0 (0.0)   | 0 (0.0)  |
| Spice, Condiment or other Ingredient (n=282) | NOVA1 (n=1)   | 0           | 0 (0.0)    | 0 (0.0)    | 0 (0.0)   | 0 (0.0)    | 0 (0.0)   | 0 (0.0)   | 0 (0.0)   | 0 (0.0)   | 0 (0.0)   | 0 (0.0)  | 0 (0.0)   | 0 (0.0)   | 0 (0.0)  |
|                                              | NOVA2 (n=1)   | 0 (0.0)     | 0 (0.0)    | 0 (0.0)    | 0 (0.0)   | 1 (100.0)  | 1 (100)   | 1 (100.0) | 0 (0.0)   | 0 (0.0)   | 0 (0.0)   | 0 (0.0)  | 0 (0.0)   | 0 (0.0)   | 0 (0.0)  |
|                                              | NOVA3 (n=7)   | 0           | 0 (0.0)    | 0 (0.0)    | 0 (0.0)   | 1 (14.3)   | 0 (0.0)   | 0 (0.0)   | 1 (14.3)  | 0 (0.0)   | 0 (0.0)   | 0 (0.0)  | 0 (0.0)   | 0 (0.0)   | 0 (0.0)  |
|                                              | NOVA4 (n=273) | 110 (40.3)  | 118 (43.2) | 80 (29.3)  | 97 (35.5) | 51 (18.7)  | 22 (8.1)  | 17 (6.2)  | 90 (33.0) | 30 (11.0) | 28 (10.3) | 7 (2.6)  | 1 (0.4)   | 65 (23.8) | 1 (0.4)  |
| Prepared food product (n=164)                | NOVA4 (n=164) | 124 (75.6)  | 111 (67.7) | 73 (44.5)  | 53 (32.3) | 18 (11.0)  | 17 (10.4) | 19 (11.6) | 50 (30.5) | 5 (3.0)   | 39 (23.8) | 2 (1.2)  | 0 (0.0)   | 73 (44.5) | 13 (7.9) |
| Ready-to-eat Food (n=38)                     | NOVA4 (n=38)  | 26 (68.4)   | 31 (81.6)  | 22 (57.9)  | 22 (57.9) | 9 (23.7)   | 7 (18.4)  | 12 (31.6) | 23 (60.5) | 23 (60.5) | 19 (50.0) | 7 (18.4) | 11 (28.9) | 32 (84.5) | 0 (0.0)  |
| Frozen, Semi-Ready Meal (n=40)               | NOVA4 (n=40)  | 9 (22.5)    | 17 (42.5)  | 8 (20.0)   | 7 (17.5)  | 1 (2.5)    | 0 (0.0)   | 6 (15.0)  | 4 (10.0)  | 5 (12.5)  | 1 (2.5)   | 0 (0.0)  | 3 (7.5)   | 12 (30.0) | 0 (0.0)  |

Table S2 Prevalence of the 14 allergens in the products' ingredient list per NOVA Group of each food subcategory.

| Food Subcategory               | NOVA Group    | Milk        | Gluten    | Soy       | Eggs       | Nuts      | Peanuts | Sesame  | Mustard  | Sulphites | Fish    | Crustaceans | Mollusks | Celery  | Lupin   |
|--------------------------------|---------------|-------------|-----------|-----------|------------|-----------|---------|---------|----------|-----------|---------|-------------|----------|---------|---------|
| Milk (n=171)                   | NOVA1 (n=94)  | 94 (100.0)  | 0 (0.0)   | 0 (0.0)   | 0 (0.0)    | 0 (0.0)   | 0 (0.0) | 0 (0.0) | 0 (0.0)  | 0 (0.0)   | 0 (0.0) | 0 (0.0)     | 0 (0.0)  | 0 (0.0) | 0 (0.0) |
|                                | NOVA3 (n=6)   | 6 (100)     | 0 (0.0)   | 0 (0.0)   | 0 (0.0)    | 0 (0.0)   | 0 (0.0) | 0 (0.0) | 0 (0.0)  | 0 (0.0)   | 0 (0.0) | 0 (0.0)     | 0 (0.0)  | 0 (0.0) | 0 (0.0) |
|                                | NOVA4 (n=71)  | 71 (100.0)  | 0 (0.0)   | 3 (4.2)   | 0 (0.0)    | 0 (0.0)   | 0 (0.0) | 0 (0.0) | 0 (0.0)  | 0 (0.0)   | 0 (0.0) | 0 (0.0)     | 0 (0.0)  | 0 (0.0) | 0 (0.0) |
| Yogurt (n=168)                 | NOVA1 (n=46)  | 46 (100.0)  | 0 (0.0)   | 0 (0.0)   | 0 (0.0)    | 0 (0.0)   | 0 (0.0) | 0 (0.0) | 0 (0.0)  | 0 (0.0)   | 0 (0.0) | 0 (0.0)     | 0 (0.0)  | 0 (0.0) | 0 (0.0) |
|                                | NOVA4 (n=122) | 122 (100.0) | 23 (18.9) | 6 (4.9)   | 3 (2.5)    | 8 (6.6)   | 0 (0.0) | 0 (0.0) | 0 (0.0)  | 0 (0.0)   | 0 (0.0) | 0 (0.0)     | 0 (0.0)  | 0 (0.0) | 0 (0.0) |
| Cheese (n=209)                 | NOVA3 (n=124) | 124 (100.0) | 0 (0.0)   | 0 (0.0)   | 0 (0.0)    | 0 (0.0)   | 0 (0.0) | 0 (0.0) | 0 (0.0)  | 0 (0.0)   | 0 (0.0) | 0 (0.0)     | 0 (0.0)  | 0 (0.0) | 0 (0.0) |
|                                | NOVA4 (n=85)  | 85 (100.0)  | 3 (3.5)   | 0 (0.0)   | 1 (1.2)    | 0 (0.0)   | 0 (0.0) | 0 (0.0) | 0 (0.0)  | 1 (1.2)   | 1 (1.2) | 0 (0.0)     | 0 (0.0)  | 1 (1.2) | 0 (0.0) |
| Milk Substitute (n=334)        | NOVA1 (n=6)   | 0 (0.0)     | 1 (16.7)  | 3 (50.0)  | 0 (0.0)    | 2 (33.3)  | 0 (0.0) | 0 (0.0) | 0 (0.0)  | 0 (0.0)   | 0 (0.0) | 0 (0.0)     | 0 (0.0)  | 0 (0.0) | 0 (0.0) |
|                                | NOVA3 (n=37)  | 0 (0.0)     | 13 (35.1) | 5 (13.5)  | 0 (0.0)    | 14 (37.8) | 0 (0.0) | 0 (0.0) | 0 (0.0)  | 0 (0.0)   | 0 (0.0) | 0 (0.0)     | 0 (0.0)  | 0 (0.0) | 0 (0.0) |
|                                | NOVA4 (n=291) | 5 (1.7)     | 47 (16.2) | 62 (21.3) | 0 (0.0)    | 98 (33.7) | 3 (1.0) | 4 (1.4) | 0 (0.0)  | 0 (0.0)   | 0 (0.0) | 0 (0.0)     | 0 (0.0)  | 4 (1.4) | 0 (0.0) |
| Milk Cream (n=40)              | NOVA4 (n=40)  | 40 (100.0)  | 0 (0.0)   | 2 (5.0)   | 0 (0.0)    | 0 (0.0)   | 0 (0.0) | 0 (0.0) | 0 (0.0)  | 0 (0.0)   | 0 (0.0) | 0 (0.0)     | 0 (0.0)  | 0 (0.0) | 0 (0.0) |
| Dairy Dessert (n=43)           | NOVA4 (n=43)  | 41 (95.3)   | 8 (18.6)  | 24 (55.8) | 6 (14.0)   | 15 (34.9) | 0 (0.0) | 0 (0.0) | 0 (0.0)  | 0 (0.0)   | 0 (0.0) | 0 (0.0)     | 0 (0.0)  | 0 (0.0) | 0 (0.0) |
| Fresh or processed eggs (n=35) | NOVA1 (n=34)  | 3 (8.8)     | 1 (2.9)   | 1 (2.9)   | 34 (100.0) | 1 (2.9)   | 0 (0.0) | 0 (0.0) | 0 (0.0)  | 0 (0.0)   | 0 (0.0) | 0 (0.0)     | 0 (0.0)  | 0 (0.0) | 0 (0.0) |
|                                | NOVA4 (n=1)   | 0 (0.0)     | 0 (0.0)   | 0 (0.0)   | 1 (100.0)  | 0 (0.0)   | 0 (0.0) | 0 (0.0) | 0 (0.0)  | 0 (0.0)   | 0 (0.0) | 0 (0.0)     | 0 (0.0)  | 0 (0.0) | 0 (0.0) |
| Egg imitation (n=1)            | NOVA4 (n=1)   | 0 (0.0)     | 0 (0.0)   | 1 (100.0) | 0 (0.0)    | 0 (0.0)   | 0 (0.0) | 0 (0.0) | 0 (0.0)  | 0 (0.0)   | 0 (0.0) | 0 (0.0)     | 0 (0.0)  | 0 (0.0) | 0 (0.0) |
| Poultry meat (n=2)             | NOVA4 (n=2)   | 2 (100.0)   | 0 (0.0)   | 0 (0.0)   | 0 (0.0)    | 0 (0.0)   | 0 (0.0) | 0 (0.0) | 0 (0.0)  | 0 (0.0)   | 0 (0.0) | 0 (0.0)     | 0 (0.0)  | 0 (0.0) | 0 (0.0) |
| Meat analogue (n=110)          | NOVA4 (n=110) | 0 (0.0)     | 64 (58.2) | 44 (40.0) | 0 (0.0)    | 0 (0.0)   | 0 (0.0) | 1 (0.9) | 6 (5.5)  | 3 (2.7)   | 0 (0.0) | 0 (0.0)     | 0 (0.0)  | 1 (0.9) | 0 (0.0) |
| Preserved meat (n=82)          | NOVA1 (n=1)   | 1 (100.0)   | 0 (0.0)   | 1 (100.0) | 0 (0.0)    | 0 (0.0)   | 1 (100) | 0 (0.0) | 1 (100)  | 0 (0.0)   | 0 (0.0) | 0 (0.0)     | 0 (0.0)  | 1 (100) | 0 (0.0) |
|                                | NOVA3 (n=2)   | 0 (0.0)     | 0 (0.0)   | 0 (0.0)   | 0 (0.0)    | 0 (0.0)   | 0 (0.0) | 0 (0.0) | 0 (0.0)  | 0 (0.0)   | 0 (0.0) | 0 (0.0)     | 0 (0.0)  | 0 (0.0) | 0 (0.0) |
|                                | NOVA4 (n=79)  | 34 (43.0)   | 6 (7.6)   | 22 (27.8) | 1 (1.3)    | 0 (0.0)   | 4 (5.1) | 0 (0.0) | 9 (11.4) | 2 (2.5)   | 0 (0.0) | 0 (0.0)     | 0 (0.0)  | 7 (8.9) | 0 (0.0) |

|                                               |               |            |            |            |           |           |          |           |          |          |           |         |          |           |         |
|-----------------------------------------------|---------------|------------|------------|------------|-----------|-----------|----------|-----------|----------|----------|-----------|---------|----------|-----------|---------|
| Sausage or similar meat (n=37)                | NOVA4 (n=37)  | 13 (35.1)  | 2 (5.4)    | 11 (29.7)  | 0 (0.0)   | 0 (0.0)   | 1 (2.7)  | 0 (0.0)   | 5 (13.5) | 2 (5.4)  | 0 (0.0)   | 0 (0.0) | 0 (0.0)  | 1 (2.7)   | 0 (0.0) |
| Meat dish (n=17)                              | NOVA4 (n=17)  | 8 (47.1)   | 14 (82.4)  | 5 (29.4)   | 4 (23.5)  | 0 (0.0)   | 1 (5.9)  | 0 (0.0)   | 1 (5.9)  | 0 (0.0)  | 0 (0.0)   | 0 (0.0) | 0 (0.0)  | 2 (11.8)  | 0 (0.0) |
| Seafood product (n=78)                        | NOVA3 (n=52)  | 0 (0.0)    | 0 (0.0)    | 2 (3.8)    | 0 (0.0)   | 0 (0.0)   | 0 (0.0)  | 0 (0.0)   | 0 (0.0)  | 0 (0.0)  | 50 (96.2) | 0 (0.0) | 2 (3.8)  | 3 (5.8)   | 0 (0.0) |
|                                               | NOVA4 (n=26)  | 1 (3.8)    | 9 (34.6)   | 1 (3.8)    | 0 (0.0)   | 0 (0.0)   | 0 (0.0)  | 0 (0.0)   | 1 (3.8)  | 2 (7.7)  | 19 (73.1) | 1 (3.8) | 7 (26.9) | 0 (0.0)   | 0 (0.0) |
| Vegetable fat or oil (n=8)                    | NOVA2 (n=1)   | 0 (0.0)    | 0 (0.0)    | 0 (0.0)    | 0 (0.0)   | 0 (0.0)   | 0 (0.0)  | 0 (0.0)   | 0 (0.0)  | 0 (0.0)  | 0 (0.0)   | 0 (0.0) | 0 (0.0)  | 0 (0.0)   | 0 (0.0) |
|                                               | NOVA4 (n=7)   | 3 (42.9)   | 0          | 0 (0.0)    | 0 (0.0)   | 0 (0.0)   | 0 (0.0)  | 0 (0.0)   | 0 (0.0)  | 0 (0.0)  | 0 (0.0)   | 0 (0.0) | 0 (0.0)  | 0 (0.0)   | 0 (0.0) |
| Margarine or lipid of mixed origins (n=39)    | NOVA4 (n=39)  | 21 (53.8)  | 0 (0.0)    | 1 (2.6)    | 0 (0.0)   | 0 (0.0)   | 0 (0.0)  | 0 (0.0)   | 0 (0.0)  | 0 (0.0)  | 0 (0.0)   | 0 (0.0) | 0 (0.0)  | 0 (0.0)   | 0 (0.0) |
| Butter or other animal fat (n=34)             | NOVA2 (n=32)  | 32 (100.0) | 0 (0.0)    | 0 (0.0)    | 0 (0.0)   | 0 (0.0)   | 0 (0.0)  | 0 (0.0)   | 0 (0.0)  | 0 (0.0)  | 0 (0.0)   | 0 (0.0) | 0 (0.0)  | 0 (0.0)   | 0 (0.0) |
|                                               | NOVA4 (n=2)   | 2 (100.0)  | 0 (0.0)    | 0 (0.0)    | 0 (0.0)   | 0 (0.0)   | 0 (0.0)  | 0 (0.0)   | 0 (0.0)  | 0 (0.0)  | 0 (0.0)   | 0 (0.0) | 0 (0.0)  | 0 (0.0)   | 0 (0.0) |
| Cereal or cereal-like milling products (n=51) | NOVA4 (n=51)  | 11 (21.6)  | 51 (100.0) | 12 (23.5)  | 7 (13.7)  | 0 (0.0)   | 0 (0.0)  | 0 (0.0)   | 0 (0.0)  | 0 (0.0)  | 0 (0.0)   | 0 (0.0) | 0 (0.0)  | 0 (0.0)   | 0 (0.0) |
| Rice or other grain (n=97)                    | NOVA1 (n=64)  | 0 (0.0)    | 2 (3.1)    | 0 (0.0)    | 0 (0.0)   | 0 (0.0)   | 0 (0.0)  | 0 (0.0)   | 0 (0.0)  | 0 (0.0)  | 0 (0.0)   | 0 (0.0) | 0 (0.0)  | 0 (0.0)   | 0 (0.0) |
|                                               | NOVA3 (n=2)   | 0 (0.0)    | 0 (0.0)    | 0 (0.0)    | 0 (0.0)   | 0 (0.0)   | 0 (0.0)  | 0 (0.0)   | 0 (0.0)  | 0 (0.0)  | 0 (0.0)   | 0 (0.0) | 0 (0.0)  | 0 (0.0)   | 0 (0.0) |
|                                               | NOVA4 (n=31)  | 7 (22.6)   | 25 (80.6)  | 14 (45.2)  | 5 (16.1)  | 0 (0.0)   | 0 (0.0)  | 0 (0.0)   | 3 (9.7)  | 0 (0.0)  | 1 (3.2)   |         | 0 (0.0)  | 10 (32.3) | 0 (0.0) |
| Pasta and similar products (n=200)            | NOVA1 (n=165) | 5 (3.0)    | 161 (98.2) | 1 (0.6)    | 10 (6.1)  | 0 (0.0)   | 0 (0.0)  | 0 (0.0)   | 0 (0.0)  | 0 (0.0)  | 0 (0.0)   | 0 (0.0) | 0 (0.0)  | 0 (0.0)   | 0 (0.0) |
|                                               | NOVA3 (n=9)   | 8 (88.9)   | 9 (100.0)  | 0 (0.0)    | 2 (22.2)  | 0 (0.0)   | 0 (0.0)  | 0 (0.0)   | 0 (0.0)  | 0 (0.0)  | 0 (0.0)   | 0 (0.0) | 0 (0.0)  | 0 (0.0)   | 0 (0.0) |
|                                               | NOVA4 (n=26)  | 16 (61.5)  | 22 (84.6)  | 0 (0.0)    | 16 (61.5) | 0 (0.0)   | 0 (0.0)  | 0 (0.0)   | 0 (0.0)  | 0 (0.0)  | 0 (0.0)   | 0 (0.0) | 0 (0.0)  | 0 (0.0)   | 0 (0.0) |
| Breakfast cereals (n=149)                     | NOVA1 (n=4)   | 0 (0.0)    | 4 (100.0)  | 0 (0.0)    | 0 (0.0)   | 0 (0.0)   | 0 (0.0)  | 0 (0.0)   | 0 (0.0)  | 0 (0.0)  | 0 (0.0)   | 0 (0.0) | 0 (0.0)  | 0 (0.0)   | 0 (0.0) |
|                                               | NOVA3 (n=1)   | 0 (0.0)    | 1 (100.0)  | 0 (0.0)    | 0 (0.0)   | 0 (0.0)   | 0 (0.0)  | 0 (0.0)   | 0 (0.0)  | 0 (0.0)  | 0 (0.0)   | 0 (0.0) | 0 (0.0)  | 0 (0.0)   | 0 (0.0) |
|                                               | NOVA4 (n=144) | 63 (43.8)  | 132 (91.7) | 66 (45.8)  | 0 (0.0)   | 26 (18.1) | 11 (7.6) | 2 (1.4)   | 0 (0.0)  | 12 (8.3) | 0 (0.0)   | 0 (0.0) | 0 (0.0)  | 0 (0.0)   | 0 (0.0) |
| Bread and similar products (n=242)            | NOVA4 (n=242) | 33 (13.6)  | 236 (97.5) | 32 (13.2)  | 9 (3.7)   | 1 (0.4)   | 0 (0.0)  | 47 (19.4) | 3 (1.2)  | 4 (1.7)  | 0 (0.0)   | 0 (0.0) | 0 (0.0)  | 1 (0.4)   | 1 (0.4) |
| Fine bakery ware (n=279)                      | NOVA4 (n=279) | 189 (67.7) | 277 (99.3) | 155 (55.6) | 91 (32.6) | 43 (15.4) | 3 (1.1)  | 9 (3.2)   | 0 (0.0)  | 7 (2.5)  | 0 (0.0)   | 0 (0.0) | 0 (0.0)  | 0 (0.0)   | 3 (1.1) |

|                                       |               |           |            |           |           |           |           |           |         |           |         |         |         |         |         |
|---------------------------------------|---------------|-----------|------------|-----------|-----------|-----------|-----------|-----------|---------|-----------|---------|---------|---------|---------|---------|
| Savory cereal dish (n=86)             | NOVA4 (n=86)  | 82 (95.3) | 86 (100.0) | 21 (24.4) | 31 (36.0) | 0 (0.0)   | 1 (1.2)   | 4 (4.7)   | 2 (2.3) | 0 (0.0)   | 0 (0.0) | 0 (0.0) | 0 (0.0) | 3 (3.5) | 0 (0.0) |
| Nuts (n=65)                           | NOVA1 (n=20)  | 0 (0.0)   | 1 (5.0)    | 0 (0.0)   | 0 (0.0)   | 15 (75.0) | 0 (0.0)   | 0 (0.0)   | 0 (0.0) | 0 (0.0)   | 0 (0.0) | 0 (0.0) | 0 (0.0) | 0 (0.0) | 0 (0.0) |
|                                       | NOVA3 (n=14)  | 0 (0.0)   | 1 (7.1)    | 0 (0.0)   | 0 (0.0)   | 9 (64.3)  | 6 (42.9)  | 0 (0.0)   | 0 (0.0) | 0 (0.0)   | 0 (0.0) | 0 (0.0) | 0 (0.0) | 0 (0.0) | 0 (0.0) |
|                                       | NOVA4 (n=31)  | 2 (6.5)   | 17 (54.8)  | 4 (12.9)  | 0 (0.0)   | 16 (51.6) | 16 (51.6) | 1 (3.2)   | 0 (0.0) | 4 (12.9)  | 0 (0.0) | 0 (0.0) | 0 (0.0) | 0 (0.0) | 0 (0.0) |
| Seeds and kernels (n=35)              | NOVA3 (n=18)  | 0 (0.0)   | 0 (0.0)    | 0 (0.0)   | 0 (0.0)   | 0 (0.0)   | 0 (0.0)   | 0 (0.0)   | 0 (0.0) | 0 (0.0)   | 0 (0.0) | 0 (0.0) | 0 (0.0) | 0 (0.0) | 0 (0.0) |
|                                       | NOVA4 (n=17)  | 1 (5.9)   | 0 (0.0)    | 0 (0.0)   | 0 (0.0)   | 0 (0.0)   | 0 (0.0)   | 0 (0.0)   | 0 (0.0) | 0 (0.0)   | 0 (0.0) | 0 (0.0) | 0 (0.0) | 0 (0.0) | 0 (0.0) |
| Nut or seed product (n=27)            | NOVA1 (n=9)   | 0 (0.0)   | 0 (0.0)    | 0 (0.0)   | 0 (0.0)   | 0 (0.0)   | 0 (0.0)   | 9 (100.0) | 0 (0.0) | 0 (0.0)   | 0 (0.0) | 0 (0.0) | 0 (0.0) | 0 (0.0) | 0 (0.0) |
|                                       | NOVA4 (n=18)  | 1 (5.6)   | 0          | 6 (33.3)  | 0 (0.0)   | 2 (11.1)  | 4 (22.2)  | 12 (66.7) | 0 (0.0) | 0 (0.0)   | 0 (0.0) | 0 (0.0) | 0 (0.0) | 0 (0.0) | 0 (0.0) |
| Vegetable (excluding potato) (n=170)  | NOVA1 (n=65)  | 0 (0.0)   | 0 (0.0)    | 0 (0.0)   | 0 (0.0)   | 0 (0.0)   | 0 (0.0)   | 0 (0.0)   | 0 (0.0) | 0 (0.0)   | 0 (0.0) | 0 (0.0) | 0 (0.0) | 0 (0.0) | 0 (0.0) |
|                                       | NOVA3 (n=35)  | 1 (2.9)   | 0 (0.0)    | 0 (0.0)   | 0 (0.0)   | 0 (0.0)   | 0 (0.0)   | 0 (0.0)   | 1 (2.9) | 0 (0.0)   | 0 (0.0) | 0 (0.0) | 0 (0.0) | 0 (0.0) | 0 (0.0) |
|                                       | NOVA4 (n=70)  | 3 (4.3)   | 1 (1.4)    | 0 (0.0)   | 0 (0.0)   | 0 (0.0)   | 0 (0.0)   | 0 (0.0)   | 0 (0.0) | 3 (4.7)   | 0 (0.0) | 0 (0.0) | 0 (0.0) | 0 (0.0) | 0 (0.0) |
| Starchy root or potato (n=21)         | NOVA1 (n=1)   | 0 (0.0)   | 0 (0.0)    | 0 (0.0)   | 0 (0.0)   | 0 (0.0)   | 0 (0.0)   | 0 (0.0)   | 0 (0.0) | 0 (0.0)   | 0 (0.0) | 0 (0.0) | 0 (0.0) | 0 (0.0) | 0 (0.0) |
|                                       | NOVA3 (n=2)   | 0 (0.0)   | 0 (0.0)    | 0 (0.0)   | 0 (0.0)   | 0 (0.0)   | 0 (0.0)   | 0 (0.0)   | 0 (0.0) | 0 (0.0)   | 0 (0.0) | 0 (0.0) | 0 (0.0) | 0 (0.0) | 0 (0.0) |
|                                       | NOVA4 (n=18)  | 2 (11.1)  | 0          | 0 (0.0)   | 0 (0.0)   | 0 (0.0)   | 0 (0.0)   | 0 (0.0)   | 0 (0.0) | 5 (27.8)  | 0 (0.0) | 0 (0.0) | 0 (0.0) | 0 (0.0) | 0 (0.0) |
| Pulse and pulse product (n=341)       | NOVA1 (n=341) | 0 (0.0)   | 1 (0.3)    | 0 (0.0)   | 0 (0.0)   | 0 (0.0)   | 0 (0.0)   | 0 (0.0)   | 0 (0.0) | 0 (0.0)   | 0 (0.0) | 0 (0.0) | 0 (0.0) | 0 (0.0) | 0 (0.0) |
| Processed food product (fruit) (n=42) | NOVA1 (n=1)   | 0 (0.0)   | 0 (0.0)    | 0 (0.0)   | 0 (0.0)   | 0 (0.0)   | 0 (0.0)   | 0 (0.0)   | 0 (0.0) | 1 (100)   | 0 (0.0) | 0 (0.0) | 0 (0.0) | 0 (0.0) | 0 (0.0) |
|                                       | NOVA3 (n=5)   | 0 (0.0)   | 0 (0.0)    | 0 (0.0)   | 0 (0.0)   | 0 (0.0)   | 0 (0.0)   | 0 (0.0)   | 0 (0.0) | 0 (0.0)   | 0 (0.0) | 0 (0.0) | 0 (0.0) | 0 (0.0) | 0 (0.0) |
|                                       | NOVA4 (n=36)  | 0 (0.0)   | 0          | 0 (0.0)   | 0 (0.0)   | 0 (0.0)   | 0 (0.0)   | 0 (0.0)   | 0 (0.0) | 14 (38.9) | 0 (0.0) | 0 (0.0) | 0 (0.0) | 0 (0.0) | 0 (0.0) |
| Sugar, honey or syrup (n=46)          | NOVA1 (n=1)   | 0 (0.0)   | 0 (0.0)    | 0 (0.0)   | 0 (0.0)   | 0 (0.0)   | 0 (0.0)   | 0 (0.0)   | 0 (0.0) | 0 (0.0)   | 0 (0.0) | 0 (0.0) | 0 (0.0) | 0 (0.0) | 0 (0.0) |
|                                       | NOVA2 (n=35)  | 0 (0.0)   | 0 (0.0)    | 0 (0.0)   | 0 (0.0)   | 0 (0.0)   | 0 (0.0)   | 0 (0.0)   | 0 (0.0) | 0 (0.0)   | 0 (0.0) | 0 (0.0) | 0 (0.0) | 0 (0.0) | 0 (0.0) |
|                                       | NOVA3 (n=6)   | 0 (0.0)   | 0 (0.0)    | 0 (0.0)   | 0 (0.0)   | 0 (0.0)   | 0 (0.0)   | 0 (0.0)   | 0 (0.0) | 0 (0.0)   | 0 (0.0) | 0 (0.0) | 0 (0.0) | 0 (0.0) | 0 (0.0) |
|                                       | NOVA4 (n=4)   | 0 (0.0)   | 0 (0.0)    | 0 (0.0)   | 0 (0.0)   | 0 (0.0)   | 0 (0.0)   | 0 (0.0)   | 0 (0.0) | 0 (0.0)   | 0 (0.0) | 0 (0.0) | 0 (0.0) | 0 (0.0) | 0 (0.0) |
| Jam or marmalade (n=83)               | NOVA4 (n=83)  | 1 (1.2)   | 2 (2.4)    | 0 (0.0)   | 1 (1.2)   | 1 (1.2)   | 0 (0.0)   | 0 (0.0)   | 0 (0.0) | 0 (0.0)   | 0 (0.0) | 0 (0.0) | 0 (0.0) | 0 (0.0) | 0 (0.0) |
|                                       | NOVA3 (n=22)  | 0 (0.0)   | 0 (0.0)    | 0 (0.0)   | 0 (0.0)   | 2 (9.1)   | 1 (4.5)   | 7 (31.8)  | 0 (0.0) | 1 (4.5)   | 0 (0.0) | 0 (0.0) | 0 (0.0) | 0 (0.0) | 0 (0.0) |



|                                                           |               |            |           |            |           |           |         |           |           |           |          |         |         |           |         |
|-----------------------------------------------------------|---------------|------------|-----------|------------|-----------|-----------|---------|-----------|-----------|-----------|----------|---------|---------|-----------|---------|
| Non-chocolate confectionery or other sugar product (n=68) | NOVA4 (n=46)  | 1 (2.2)    | 1 (2.2)   | 2 (4.3)    | 3 (6.5)   | 12 (26.1) | 2 (4.3) | 31 (67.4) | 0 (0.0)   | 5 (10.9)  | 0 (0.0)  | 0 (0.0) | 0 (0.0) | 0 (0.0)   | 0 (0.0) |
| Chocolate or chocolate product (n=207)                    | NOVA4 (n=207) | 159 (76.8) | 49 (23.7) | 182 (87.9) | 1 (0.5)   | 75 (36.2) | 8 (3.9) | 1 (0.5)   | 0 (0.0)   | 1 (0.5)   | 0 (0.0)  | 0 (0.0) | 0 (0.0) | 0 (0.0)   | 0 (0.0) |
| Juice or nectar (n=163)                                   | NOVA1 (n=48)  | 0          | 0 (0.0)   | 0 (0.0)    | 0 (0.0)   | 0 (0.0)   | 0 (0.0) | 0 (0.0)   | 0 (0.0)   | 0 (0.0)   | 0 (0.0)  | 0 (0.0) | 0 (0.0) | 0 (0.0)   | 0 (0.0) |
|                                                           | NOVA3 (n=1)   | 0 (0.0)    | 0 (0.0)   | 0 (0.0)    | 0 (0.0)   | 0 (0.0)   | 0 (0.0) | 0 (0.0)   | 0 (0.0)   | 0 (0.0)   | 0 (0.0)  | 0 (0.0) | 0 (0.0) | 1 (100)   | 0 (0.0) |
|                                                           | NOVA4 (n=114) | 0 (0.0)    | 0         | 0 (0.0)    | 0 (0.0)   | 0 (0.0)   | 0 (0.0) | 0 (0.0)   | 0 (0.0)   | 2 (1.8)   | 0 (0.0)  | 0 (0.0) | 0 (0.0) | 0 (0.0)   | 0 (0.0) |
| Non-alcoholic beverage (n=283)                            | NOVA4 (n=283) | 5 (1.8)    | 2 (0.7)   | 10 (3.5)   | 0 (0.0)   | 0 (0.0)   | 0 (0.0) | 0 (0.0)   | 0 (0.0)   | 0 (0.0)   | 0 (0.0)  | 0 (0.0) | 0 (0.0) | 0 (0.0)   | 0 (0.0) |
| Spice, Condiment or other Ingredient (n=282)              | NOVA1 (n=1)   | 0          | 0 (0.0)   | 0 (0.0)    | 0 (0.0)   | 0 (0.0)   | 0 (0.0) | 0 (0.0)   | 0 (0.0)   | 0 (0.0)   | 0 (0.0)  | 0 (0.0) | 0 (0.0) | 0 (0.0)   | 0 (0.0) |
|                                                           | NOVA2 (n=1)   | 0          | 0 (0.0)   | 0 (0.0)    | 0 (0.0)   | 0 (0.0)   | 0 (0.0) | 1 (100.0) | 0 (0.0)   | 0 (0.0)   | 0 (0.0)  | 0 (0.0) | 0 (0.0) | 0 (0.0)   | 0 (0.0) |
|                                                           | NOVA3 (n=7)   | 0          | 0 (0.0)   | 0 (0.0)    | 0 (0.0)   | 0 (0.0)   | 0 (0.0) | 0 (0.0)   | 1 (14.3)  | 0 (0.0)   | 0 (0.0)  | 0 (0.0) | 0 (0.0) | 0 (0.0)   | 0 (0.0) |
|                                                           | NOVA4 (n=273) | 60 (22.0)  | 65 (23.8) | 33 (12.1)  | 43 (15.8) | 7 (2.6)   | 1 (0.4) | 1 (0.4)   | 59 (21.6) | 23 (8.4)  | 3 (1.1)  | 0 (0.0) | 1 (0.4) | 25 (9.2)  | 0 (0.0) |
| Prepared food product (n=164)                             | NOVA4 (n=164) | 80 (48.8)  | 55 (33.5) | 22 (13.4)  | 29 (17.7) | 1 (0.6)   | 1 (0.6) | 4 (2.4)   | 24 (14.6) | 3 (1.8)   | 7 (4.3)  | 2 (1.2) | 0 (0.0) | 18 (11.0) | 0 (0.0) |
| Ready-to-eat Food (n=38)                                  | NOVA4 (n=38)  | 19 (50.0)  | 25 (65.8) | 11 (28.9)  | 15 (39.5) | 3 (7.9)   | 1 (2.6) | 2 (5.3)   | 12 (31.6) | 17 (44.7) | 5 (13.2) | 2 (5.3) | 1 (2.6) | 8 (21.1)  | 0 (0.0) |
| Frozen, Semi-Ready Meal (n=40)                            | NOVA4 (n=40)  | 6(15.0)    | 16 (40.0) | 8 (20.0)   | 2 (5.0)   | 1 (2.5)   | 0 (0.0) | 1 (2.5)   | 0 (0.0)   | 0 (0.0)   | 1 (2.5)  | 0 (0.0) | 0 (0.0) | 3 (7.5)   | 0 (0.0) |

Table S3 Prevalence of the 14 allergens as traces in a precautionary statement per NOVA Group of each food subcategory.

| Food Subcategory               | NOVA Group    | Milk    | Gluten    | Soy       | Eggs      | Nuts      | Peanuts | Sesame    | Mustard  | Sulphites | Fish    | Crustaceans | Mollusks | Celery   | Lupin   |
|--------------------------------|---------------|---------|-----------|-----------|-----------|-----------|---------|-----------|----------|-----------|---------|-------------|----------|----------|---------|
| Milk (n=171)                   | NOVA1 (n=94)  | 0 (0.0) | 0 (0.0)   | 0 (0.0)   | 0 (0.0)   | 0 (0.0)   | 0 (0.0) | 0 (0.0)   | 0 (0.0)  | 0 (0.0)   | 0 (0.0) | 0 (0.0)     | 0 (0.0)  | 0 (0.0)  | 0 (0.0) |
|                                | NOVA3 (n=6)   | 0 (0.0) | 0 (0.0)   | 0 (0.0)   | 0 (0.0)   | 0 (0.0)   | 0 (0.0) | 0 (0.0)   | 0 (0.0)  | 0 (0.0)   | 0 (0.0) | 0 (0.0)     | 0 (0.0)  | 0 (0.0)  | 0 (0.0) |
|                                | NOVA4 (n=71)  | 0 (0.0) | 0 (0.0)   | 0 (0.0)   | 0 (0.0)   | 0 (0.0)   | 0 (0.0) | 0 (0.0)   | 0 (0.0)  | 0 (0.0)   | 0 (0.0) | 0 (0.0)     | 0 (0.0)  | 0 (0.0)  | 0 (0.0) |
| Yogurt(n=168)                  | NOVA1 (n=46)  | 0 (0.0) | 0 (0.0)   | 0 (0.0)   | 0 (0.0)   | 0 (0.0)   | 0 (0.0) | 0 (0.0)   | 0 (0.0)  | 0 (0.0)   | 0 (0.0) | 0 (0.0)     | 0 (0.0)  | 0 (0.0)  | 0 (0.0) |
|                                | NOVA4 (n=122) | 0 (0.0) | 9 (7.4)   | 4 (3.3)   | 8 (6.6)   | 13 (10.7) | 7 (5.7) | 10 (8.2)  | 0 (0.0)  | 0 (0.0)   | 0 (0.0) | 0 (0.0)     | 0 (0.0)  | 0 (0.0)  | 1 (0.8) |
| Cheese (n=209)                 | NOVA3 (n=124) | 0 (0.0) | 0 (0.0)   | 0 (0.0)   | 0 (0.0)   | 0 (0.0)   | 0 (0.0) | 0 (0.0)   | 0 (0.0)  | 0 (0.0)   | 0 (0.0) | 0 (0.0)     | 0 (0.0)  | 0 (0.0)  | 0 (0.0) |
|                                | NOVA4 (n=85)  | 0 (0.0) | 1 (1.2)   | 3 (3.5)   | 6 (7.1)   | 0 (0.0)   | 0 (0.0) | 0 (0.0)   | 4 (4.7)  | 4 (4.7)   | 0 (0.0) | 0 (0.0)     | 0 (0.0)  | 3 (3.5)  | 0 (0.0) |
| Milk Imitations (n=334)        | NOVA1 (n=6)   | 0 (0.0) | 0 (0.0)   | 0 (0.0)   | 0 (0.0)   | 2 (33.3)  | 0 (0.0) | 0 (0.0)   | 0 (0.0)  | 0 (0.0)   | 0 (0.0) | 0 (0.0)     | 0 (0.0)  | 0 (0.0)  | 0 (0.0) |
|                                | NOVA3 (n=37)  | 0 (0.0) | 0 (0.0)   | 2 (5.4)   | 0 (0.0)   | 1 (16.7)  | 0 (0.0) | 0 (0.0)   | 0 (0.0)  | 0 (0.0)   | 0 (0.0) | 0 (0.0)     | 0 (0.0)  | 0 (0.0)  | 0 (0.0) |
|                                | NOVA4 (n=291) | 9 (3.1) | 9 (3.1)   | 19 (6.5)  | 8 (2.7)   | 48 (16.5) | 5 (1.7) | 27 (9.3)  | 16 (5.5) | 0 (0.0)   | 0 (0.0) | 0 (0.0)     | 0 (0.0)  | 12 (4.1) | 0 (0.0) |
| Milk Cream (n=40)              | NOVA4 (n=40)  | 0 (0.0) | 0 (0.0)   | 0 (0.0)   | 0 (0.0)   | 0 (0.0)   | 0 (0.0) | 0 (0.0)   | 0 (0.0)  | 0 (0.0)   | 0 (0.0) | 0 (0.0)     | 0 (0.0)  | 0 (0.0)  | 0 (0.0) |
| Dairy Dessert (n=43)           | NOVA4 (n=43)  | 0 (0.0) | 15 (34.9) | 10 (23.3) | 18 (41.9) | 20 (46.5) | 0 (0.0) | 4 (9.3)   | 0 (0.0)  | 0 (0.0)   | 0 (0.0) | 0 (0.0)     | 0 (0.0)  | 0 (0.0)  | 0 (0.0) |
| Fresh or processed eggs (n=35) | NOVA1 (n=34)  | 0 (0.0) | 2 (5.9)   | 2 (5.9)   | 0 (0.0)   | 2 (5.9)   | 0 (0.0) | 0 (0.0)   | 0 (0.0)  | 0 (0.0)   | 0 (0.0) | 0 (0.0)     | 0 (0.0)  | 0 (0.0)  | 0 (0.0) |
|                                | NOVA4 (n=1)   | 0 (0.0) | 0 (0.0)   | 0 (0.0)   | 0 (0.0)   | 0 (0.0)   | 0 (0.0) | 0 (0.0)   | 0 (0.0)  | 0 (0.0)   | 0 (0.0) | 0 (0.0)     | 0 (0.0)  | 0 (0.0)  | 0 (0.0) |
| Egg imitation (n=1)            | NOVA4 (n=1)   | 0 (0.0) | 0 (0.0)   | 0 (0.0)   | 0 (0.0)   | 0 (0.0)   | 0 (0.0) | 1 (100.0) | 1 (100)  | 0 (0.0)   | 0 (0.0) | 0 (0.0)     | 0 (0.0)  | 1 (100)  | 0 (0.0) |
| Poultry meat (n=2)             | NOVA4 (n=2)   | 0 (0.0) | 0 (0.0)   | 0 (0.0)   | 0 (0.0)   | 0 (0.0)   | 0 (0.0) | 0 (0.0)   | 0 (0.0)  | 0 (0.0)   | 0 (0.0) | 0 (0.0)     | 0 (0.0)  | 0 (0.0)  | 0 (0.0) |

|                                                               |               |           |           |           |           |           |          |           |           |           |         |         |         |           |         |
|---------------------------------------------------------------|---------------|-----------|-----------|-----------|-----------|-----------|----------|-----------|-----------|-----------|---------|---------|---------|-----------|---------|
| Meat analogue (n=110)                                         | NOVA4 (n=110) | 0 (0.0)   | 8 (7.3)   | 15 (13.6) | 3 (2.7)   | 10 (9.1)  | 0 (0.0)  | 17 (15.5) | 37 (33.6) | 0 (0.0)   | 0 (0.0) | 0 (0.0) | 0 (0.0) | 38 (34.5) | 4 (3.6) |
| Preserved meat (n=82)                                         | NOVA1 (n=1)   | 0 (0.0)   | 0 (0.0)   | 0 (0.0)   | 1 (100.0) | 1 (100.0) | 0 (0.0)  | 0 (0.0)   | 0 (0.0)   | 1 (100)   | 0 (0.0) | 0 (0.0) | 0 (0.0) | 0 (0.0)   | 0 (0.0) |
|                                                               | NOVA3 (n=2)   | 0 (0.0)   | 0 (0.0)   | 0 (0.0)   | 0 (0.0)   | 0 (0.0)   | 0 (0.0)  | 0 (0.0)   | 0 (0.0)   | 0 (0.0)   | 0 (0.0) | 0 (0.0) | 0 (0.0) | 0 (0.0)   | 0 (0.0) |
|                                                               | NOVA4 (n=79)  | 20 (25.3) | 11 (13.9) | 34 (43.0) | 28 (35.4) | 41 (51.9) | 6 (7.6)  | 1 (1.3)   | 48 (60.8) | 26 (32.9) | 0 (0.0) | 0 (0.0) | 0 (0.0) | 45 (57.0) | 0 (0.0) |
| Sausage or similar meat (n=37)                                | NOVA4 (n=37)  | 8 (21.6)  | 4 (10.8)  | 9 (24.3)  | 13 (35.1) | 11 (29.7) | 4 (10.8) | 0 (0.0)   | 15 (40.5) | 10 (27.0) | 0 (0.0) | 0 (0.0) | 0 (0.0) | 18 (48.6) | 0 (0.0) |
| Meat dish (n=17)                                              | NOVA4 (n=17)  | 7 (41.2)  | 1 (5.9)   | 0 (0.0)   | 1 (5.9)   | 1 (5.9)   | 0 (0.0)  | 0 (0.0)   | 7 (41.2)  | 0 (0.0)   | 0 (0.0) | 0 (0.0) | 0 (0.0) | 0 (0.0)   | 0 (0.0) |
| Seafood product (n=78)                                        | NOVA3 (n=52)  | 0 (0.0)   | 1 (1.9)   | 0 (0.0)   | 0 (0.0)   | 0 (0.0)   | 0 (0.0)  | 0 (0.0)   | 0 (0.0)   | 0 (0.0)   | 0 (0.0) | 1 (1.9) | 0 (0.0) | 0 (0.0)   | 0 (0.0) |
|                                                               | NOVA4 (n=26)  | 12 (30.8) | 1 (3.8)   | 1 (3.8)   | 1 (3.8)   | 0 (0.0)   | 0 (0.0)  | 0 (0.0)   | 1 (3.8)   | 0 (0.0)   | 0 (0.0) | 0 (0.0) | 2 (7.7) | 1 (3.8)   | 0 (0.0) |
| Vegetable fat or oil (n=8)                                    | NOVA2 (n=1)   | 0 (0.0)   | 0 (0.0)   | 0 (0.0)   | 0 (0.0)   | 0 (0.0)   | 0 (0.0)  | 0 (0.0)   | 0 (0.0)   | 0 (0.0)   | 0 (0.0) | 0 (0.0) | 0 (0.0) | 0 (0.0)   | 0 (0.0) |
|                                                               | NOVA4 (n=7)   | 0 (0.0)   | 0 (0.0)   | 0 (0.0)   | 0 (0.0)   | 0 (0.0)   | 0 (0.0)  | 0 (0.0)   | 0 (0.0)   | 0 (0.0)   | 0 (0.0) | 0 (0.0) | 0 (0.0) | 0 (0.0)   | 0 (0.0) |
| Margarine or lipid of mixed origins (n=39)                    | NOVA4 (n=39)  | 12 (30.8) | 0 (0.0)   | 0 (0.0)   | 0 (0.0)   | 0 (0.0)   | 0 (0.0)  | 0 (0.0)   | 0 (0.0)   | 0 (0.0)   | 0 (0.0) | 0 (0.0) | 0 (0.0) | 0 (0.0)   | 0 (0.0) |
| Butter or other animal fat (n=34)                             | NOVA2 (n=32)  | 0 (0.0)   | 0 (0.0)   | 0 (0.0)   | 0 (0.0)   | 0 (0.0)   | 0 (0.0)  | 0 (0.0)   | 0 (0.0)   | 0 (0.0)   | 0 (0.0) | 0 (0.0) | 0 (0.0) | 0 (0.0)   | 0 (0.0) |
|                                                               | NOVA4 (n=2)   | 0 (0.0)   | 0 (0.0)   | 0 (0.0)   | 0 (0.0)   | 0 (0.0)   | 0 (0.0)  | 0 (0.0)   | 0 (0.0)   | 0 (0.0)   | 0 (0.0) | 0 (0.0) | 0 (0.0) | 0 (0.0)   | 0 (0.0) |
| Cereal or cereal-like milling products and derivatives (n=51) | NOVA4 (n=51)  | 25 (49.0) | 0 (0.0)   | 15 (29.4) | 28 (54.9) | 15 (29.4) | 4 (7.8)  | 21 (41.2) | 16 (31.4) | 1 (2.0)   | 1 (2.0) | 1 (2.0) | 1 (2.0) | 5 (9.8)   | 0 (0.0) |
| Rice or other grain (n=97)                                    | NOVA1 (n=64)  | 0 (0.0)   | 1 (1.6)   | 1 (1.6)   | 1 (1.6)   | 5 (7.8)   | 5 (7.8)  | 5 (7.8)   | 0 (0.0)   | 0 (0.0)   | 0 (0.0) | 0 (0.0) | 0 (0.0) | 0 (0.0)   | 0 (0.0) |

|                                             |                  |           |           |           |            |            |           |            |           |          |          |          |         |           |          |
|---------------------------------------------|------------------|-----------|-----------|-----------|------------|------------|-----------|------------|-----------|----------|----------|----------|---------|-----------|----------|
|                                             | NOVA3<br>(n=2)   | 0 (0.0)   | 0 (0.0)   | 0 (0.0)   | 0 (0.0)    | 0 (0.0)    | 0 (0.0)   | 0 (0.0)    | 0 (0.0)   | 0 (0.0)  | 0 (0.0)  | 0 (0.0)  | 0 (0.0) | 0 (0.0)   | 0 (0.0)  |
|                                             | NOVA4<br>(n=31)  | 12 (38.7) | 3 (9.7)   | 8 (25.8)  | 16 (51.6)  | 0 (0.0)    | 5 (16.1)  | 13 (41.9)  | 16 (51.6) | 0 (0.0)  | 6 (19.4) | 0 (0.0)  | 1 (3.2) | 9 (29.0)  | 7 (22.6) |
| Pasta and<br>similar<br>products<br>(n=200) | NOVA1<br>(n=165) | 9 (5.5)   | 0 (0.0)   | 63 (38.2) | 42 (25.5)  | 1 (0.6)    | 1 (0.6)   | 1 (0.6)    | 1 (0.6)   | 0 (0.0)  | 0 (0.0)  | 0 (0.0)  | 0 (0.0) | 1 (0.6)   | 1 (0.6)  |
|                                             | NOVA3<br>(n=9)   | 0 (0.0)   | 0 (0.0)   | 0 (0.0)   | 4 (44.4)   | 0 (0.0)    | 0 (0.0)   | 3 (33.3)   | 0 (0.0)   | 0 (0.0)  | 1 (11.1) | 1 (11.1) | 0 (0.0) | 0 (0.0)   | 0 (0.0)  |
|                                             | NOVA4<br>(n=26)  | 4 (15.4)  | 0 (0.0)   | 11 (42.3) | 3 (11.5)   | 0 (0.0)    | 0 (0.0)   | 0 (0.0)    | 1 (3.8)   | 0 (0.0)  | 0 (0.0)  | 0 (0.0)  | 0 (0.0) | 1 (3.8)   | 3 (11.5) |
| Breakfast<br>cereals<br>(n=149)             | NOVA1<br>(n=4)   | 1 (25.0)  | 0 (0.0)   | 4 (100.0) | 0 (0.0)    | 1 (25.0)   | 0 (0.0)   | 1 (25.0)   | 0 (0.0)   | 1 (25.0) | 0 (0.0)  | 0 (0.0)  | 0 (0.0) | 0 (0.0)   | 0 (0.0)  |
|                                             | NOVA3<br>(n=1)   | 0 (0.0)   | 0 (0.0)   | 1 (100.0) | 0 (0.0)    | 1 (100.0)  | 1 (100)   | 0 (0.0)    | 0 (0.0)   | 0 (0.0)  | 0 (0.0)  | 0 (0.0)  | 0 (0.0) | 0 (0.0)   | 0 (0.0)  |
|                                             | NOVA4<br>(n=144) | 54 (37.5) | 3 (2.1)   | 28 (19.4) | 3 (2.1)    | 86 (59.7)  | 45 (31.3) | 24 (16.7)  | 2 (1.4)   | 0 (0.0)  | 0 (0.0)  | 0 (0.0)  | 0 (0.0) | 0 (0.0)   | 2 (1.4)  |
| Bread and<br>similar<br>products<br>(n=242) | NOVA4<br>(n=242) | 88 (35.4) | 2 (0.8)   | 41 (16.9) | 79 (32.6)  | 46 (19.0)  | 4 (1.7)   | 102 (42.1) | 1 (0.4)   | 0 (0.0)  | 0 (0.0)  | 0 (0.0)  | 0 (0.0) | 1 (0.4)   | 2 (0.8)  |
| Fine bakery<br>ware (n=279)                 | NOVA4<br>(n=279) | 51 (18.3) | 0 (0.0)   | 60 (21.5) | 106 (38.0) | 174 (62.4) | 65 (23.3) | 137 (49.1) | 5 (1.8)   | 13 (4.7) | 0 (0.0)  | 0 (0.0)  | 0 (0.0) | 5 (1.8)   | 17 (6.1) |
| Savory cereal<br>dish (n=86)                | NOVA4<br>(n=86)  | 3 (3.5)   | 0 (0.0)   | 24 (27.9) | 36 (41.9)  | 37 (43.0)  | 1 (1.2)   | 61 (70.9)  | 38 (44.2) | 2 (2.3)  | 2 (2.3)  | 0 (0.0)  | 0 (0.0) | 21 (24.4) | 1 (1.2)  |
| Nuts (n=65)                                 | NOVA1<br>(n=20)  | 0 (0.0)   | 18 (90.0) | 1 (5.0)   | 0 (0.0)    | 5 (25.0)   | 18 (90.0) | 13 (65.0)  | 0 (0.0)   | 0 (0.0)  | 0 (0.0)  | 0 (0.0)  | 0 (0.0) | 0 (0.0)   | 0 (0.0)  |
|                                             | NOVA3<br>(n=14)  | 0 (0.0)   | 9 (64.3)  | 0 (0.0)   | 0 (0.0)    | 4 (28.6)   | 8 (57.1)  | 10 (71.4)  | 0 (0.0)   | 0 (0.0)  | 0 (0.0)  | 0 (0.0)  | 0 (0.0) | 0 (0.0)   | 0 (0.0)  |
|                                             | NOVA4<br>(n=31)  | 2 (6.5)   | 11 (35.5) | 1 (3.2)   | 0 (0.0)    | 15 (48.4)  | 14 (45.2) | 20 (64.5)  | 1 (3.2)   | 0 (0.0)  | 0 (0.0)  | 0 (0.0)  | 0 (0.0) | 0 (0.0)   | 0 (0.0)  |
| Seeds and<br>kernels (n=35)                 | NOVA3<br>(n=18)  | 0 (0.0)   | 0 (0.0)   | 0 (0.0)   | 0 (0.0)    | 0 (0.0)    | 0 (0.0)   | 0 (0.0)    | 0 (0.0)   | 0 (0.0)  | 0 (0.0)  | 0 (0.0)  | 0 (0.0) | 0 (0.0)   | 0 (0.0)  |
|                                             | NOVA4<br>(n=17)  | 0 (0.0)   | 0 (0.0)   | 0 (0.0)   | 0 (0.0)    | 2 (11.8)   | 0 (0.0)   | 0 (0.0)    | 0 (0.0)   | 0 (0.0)  | 0 (0.0)  | 0 (0.0)  | 0 (0.0) | 0 (0.0)   | 0 (0.0)  |
|                                             | NOVA1<br>(n=9)   | 0 (0.0)   | 0 (0.0)   | 0 (0.0)   | 0 (0.0)    | 0 (0.0)    | 0 (0.0)   | 0 (0.0)    | 0 (0.0)   | 0 (0.0)  | 0 (0.0)  | 0 (0.0)  | 0 (0.0) | 0 (0.0)   | 0 (0.0)  |

|                                       |               |          |            |           |          |           |          |           |         |          |         |         |         |          |         |
|---------------------------------------|---------------|----------|------------|-----------|----------|-----------|----------|-----------|---------|----------|---------|---------|---------|----------|---------|
| Nut or seed product (n=27)            | NOVA4 (n=18)  | 2 (11.1) | 8 (44.4)   | 0 (0.0)   | 0 (0.0)  | 3 (16.7)  | 0 (0.0)  | 4 (22.2)  | 0 (0.0) | 3 (16.7) | 0 (0.0) | 0 (0.0) | 0 (0.0) | 0 (0.0)  | 0 (0.0) |
| Vegetable (excluding potato) (n=170)  | NOVA1 (n=65)  | 0 (0.0)  | 0 (0.0)    | 0 (0.0)   | 0 (0.0)  | 0 (0.0)   | 0 (0.0)  | 0 (0.0)   | 0 (0.0) | 0 (0.0)  | 0 (0.0) | 0 (0.0) | 0 (0.0) | 1 (1.5)  | 0 (0.0) |
|                                       | NOVA3 (n=35)  | 0 (0.0)  | 0 (0.0)    | 0 (0.0)   | 0 (0.0)  | 1 (2.9)   | 0 (0.0)  | 0 (0.0)   | 0 (0.0) | 1 (2.9)  | 0 (0.0) | 0 (0.0) | 0 (0.0) | 0 (0.0)  | 0 (0.0) |
|                                       | NOVA4 (n=70)  | 0 (0.0)  | 0 (0.0)    | 0 (0.0)   | 0 (0.0)  | 0 (0.0)   | 0 (0.0)  | 0 (0.0)   | 0 (0.0) | 1 (1.4)  | 0 (0.0) | 0 (0.0) | 0 (0.0) | 2 (2.9)  | 0 (0.0) |
| Starchy root or potato (n=21)         | NOVA1 (n=1)   | 0 (0.0)  | 0 (0.0)    | 0 (0.0)   | 0 (0.0)  | 0 (0.0)   | 0 (0.0)  | 0 (0.0)   | 0 (0.0) | 0 (0.0)  | 0 (0.0) | 0 (0.0) | 0 (0.0) | 0 (0.0)  | 0 (0.0) |
|                                       | NOVA3 (n=2)   | 0 (0.0)  | 0 (0.0)    | 0 (0.0)   | 0 (0.0)  | 0 (0.0)   | 0 (0.0)  | 0 (0.0)   | 0 (0.0) | 0 (0.0)  | 0 (0.0) | 0 (0.0) | 0 (0.0) | 0 (0.0)  | 0 (0.0) |
|                                       | NOVA4 (n=18)  | 8 (44.4) | 6 (33.3)   | 0 (0.0)   | 3 (16.7) | 0 (0.0)   | 0 (0.0)  | 0 (0.0)   | 0 (0.0) | 0 (0.0)  | 0 (0.0) | 0 (0.0) | 0 (0.0) | 3 (16.7) | 0 (0.0) |
| Pulse and pulse product (n=341)       | NOVA1 (n=341) | 0 (0.0)  | 121 (35.5) | 79 (23.2) | 0 (0.0)  | 90 (26.4) | 12 (3.5) | 81 (23.8) | 0 (0.0) | 0 (0.0)  | 0 (0.0) | 0 (0.0) | 0 (0.0) | 5 (1.5)  | 0 (0.0) |
| Processed food product (fruit) (n=42) | NOVA1 (n=1)   | 0 (0.0)  | 0 (0.0)    | 0 (0.0)   | 0 (0.0)  | 0 (0.0)   | 0 (0.0)  | 0 (0.0)   | 0 (0.0) | 0 (0.0)  | 0 (0.0) | 0 (0.0) | 0 (0.0) | 0 (0.0)  | 0 (0.0) |
|                                       | NOVA3 (n=5)   | 0 (0.0)  | 0 (0.0)    | 0 (0.0)   | 0 (0.0)  | 0 (0.0)   | 0 (0.0)  | 0 (0.0)   | 0 (0.0) | 0 (0.0)  | 0 (0.0) | 0 (0.0) | 0 (0.0) | 0 (0.0)  | 0 (0.0) |
|                                       | NOVA4 (n=36)  | 0 (0.0)  | 4 (11.1)   | 0 (0.0)   | 0 (0.0)  | 4 (11.1)  | 4 (11.1) | 2 (5.6)   | 0 (0.0) | 1 (2.8)  | 0 (0.0) | 0 (0.0) | 0 (0.0) | 0 (0.0)  | 0 (0.0) |
| Sugar, honey or syrup (n=46)          | NOVA1 (n=1)   | 0 (0.0)  | 0 (0.0)    | 0 (0.0)   | 0 (0.0)  | 0 (0.0)   | 0 (0.0)  | 0 (0.0)   | 0 (0.0) | 0 (0.0)  | 0 (0.0) | 0 (0.0) | 0 (0.0) | 0 (0.0)  | 0 (0.0) |
|                                       | NOVA2 (n=35)  | 0 (0.0)  | 0 (0.0)    | 0 (0.0)   | 0 (0.0)  | 0 (0.0)   | 0 (0.0)  | 0 (0.0)   | 0 (0.0) | 0 (0.0)  | 0 (0.0) | 0 (0.0) | 0 (0.0) | 0 (0.0)  | 0 (0.0) |
|                                       | NOVA3 (n=6)   | 0 (0.0)  | 0 (0.0)    | 0 (0.0)   | 0 (0.0)  | 0 (0.0)   | 0 (0.0)  | 0 (0.0)   | 0 (0.0) | 0 (0.0)  | 0 (0.0) | 0 (0.0) | 0 (0.0) | 0 (0.0)  | 0 (0.0) |
|                                       | NOVA4 (n=4)   | 0 (0.0)  | 0 (0.0)    | 0 (0.0)   | 0 (0.0)  | 0 (0.0)   | 0 (0.0)  | 0 (0.0)   | 0 (0.0) | 0 (0.0)  | 0 (0.0) | 0 (0.0) | 0 (0.0) | 0 (0.0)  | 0 (0.0) |
| Jam or marmalade (n=83)               | NOVA4 (n=83)  | 2 (2.4)  | 9 (10.8)   | 0 (0.0)   | 0 (0.0)  | 0 (0.0)   | 0 (0.0)  | 0 (0.0)   | 0 (0.0) | 4 (4.8)  | 0 (0.0) | 0 (0.0) | 0 (0.0) | 0 (0.0)  | 0 (0.0) |
| Non-chocolate                         | NOVA3 (n=22)  | 0 (0.0)  | 0 (0.0)    | 0 (0.0)   | 0 (0.0)  | 7 (31.8)  | 5 (22.7) | 1 (4.5)   | 0 (0.0) | 0 (0.0)  | 0 (0.0) | 0 (0.0) | 0 (0.0) | 0 (0.0)  | 0 (0.0) |

|                                              |               |           |            |           |           |            |           |           |           |          |           |          |           |           |          |
|----------------------------------------------|---------------|-----------|------------|-----------|-----------|------------|-----------|-----------|-----------|----------|-----------|----------|-----------|-----------|----------|
| confectionery or other sugar product (n=68)  | NOVA4 (n=46)  | 2 (4.3)   | 2 (4.3)    | 1 (2.2)   | 2 (4.3)   | 24 (52.2)  | 27 (58.7) | 3 (6.5)   | 0 (0.0)   | 5 (10.9) | 0 (0.0)   | 0 (0.0)  | 0 (0.0)   | 0 (0.0)   | 0 (0.0)  |
| Chocolate or chocolate product (n=207)       | NOVA4 (n=207) | 48 (23.2) | 113 (54.6) | 3 (1.4)   | 27 (13.0) | 121 (58.5) | 68 (32.9) | 13 (6.3)  | 0 (0.0)   | 5 (2.4)  | 0 (0.0)   | 0 (0.0)  | 0 (0.0)   | 0 (0.0)   | 0 (0.0)  |
| Juice or nectar (n=163)                      | NOVA1 (n=48)  | 0 (0.0)   | 0 (0.0)    | 0 (0.0)   | 0 (0.0)   | 0 (0.0)    | 0 (0.0)   | 0 (0.0)   | 0 (0.0)   | 0 (0.0)  | 0 (0.0)   | 0 (0.0)  | 0 (0.0)   | 0 (0.0)   | 0 (0.0)  |
|                                              | NOVA3 (n=1)   | 0 (0.0)   | 0 (0.0)    | 0 (0.0)   | 0 (0.0)   | 0 (0.0)    | 0 (0.0)   | 0 (0.0)   | 0 (0.0)   | 0 (0.0)  | 0 (0.0)   | 0 (0.0)  | 0 (0.0)   | 0 (0.0)   | 0 (0.0)  |
|                                              | NOVA4 (n=114) | 0 (0.0)   | 0 (0.0)    | 0 (0.0)   | 0 (0.0)   | 0 (0.0)    | 0 (0.0)   | 0 (0.0)   | 0 (0.0)   | 0 (0.0)  | 0 (0.0)   | 0 (0.0)  | 0 (0.0)   | 0 (0.0)   | 0 (0.0)  |
| Non-alcoholic beverage (n=283)               | NOVA4 (n=283) | 10 (3.5)  | 3 (1.1)    | 4 (1.4)   | 0 (0.0)   | 3 (1.1)    | 1 (0.4)   | 1 (0.4)   | 0 (0.0)   | 0 (0.0)  | 0 (0.0)   | 0 (0.0)  | 0 (0.0)   | 0 (0.0)   | 0 (0.0)  |
| Spice, Condiment or other Ingredient (n=282) | NOVA1 (n=1)   | 0 (0.0)   | 0 (0.0)    | 0 (0.0)   | 0 (0.0)   | 0 (0.0)    | 0 (0.0)   | 0 (0.0)   | 0 (0.0)   | 0 (0.0)  | 0 (0.0)   | 0 (0.0)  | 0 (0.0)   | 0 (0.0)   | 0 (0.0)  |
|                                              | NOVA2 (n=1)   | 0 (0.0)   | 0 (0.0)    | 0 (0.0)   | 0 (0.0)   | 1 (100.0)  | 1 (100)   | 0 (0.0)   | 0 (0.0)   | 0 (0.0)  | 0 (0.0)   | 0 (0.0)  | 0 (0.0)   | 0 (0.0)   | 0 (0.0)  |
|                                              | NOVA3 (n=7)   | 0 (0.0)   | 0 (0.0)    | 0 (0.0)   | 0 (0.0)   | 1 (14.3)   | 0 (0.0)   | 0 (0.0)   | 0 (0.0)   | 0 (0.0)  | 0 (0.0)   | 0 (0.0)  | 0 (0.0)   | 0 (0.0)   | 0 (0.0)  |
|                                              | NOVA4 (n=273) | 50 (18.3) | 53 (19.4)  | 47 (17.2) | 54 (19.8) | 44 (16.1)  | 21 (7.7)  | 16 (5.9)  | 31 (11.4) | 7 (2.6)  | 25 (9.2)  | 7 (2.6)  | 0 (0.0)   | 40 (14.7) | 1 (0.4)  |
| Prepared food product (n=164)                | NOVA4 (n=164) | 45 (27.4) | 56 (34.1)  | 51 (31.1) | 24 (14.6) | 17 (10.4)  | 16 (9.8)  | 15 (9.1)  | 26 (15.9) | 2 (1.2)  | 32 (19.5) | 0 (0.0)  | 0 (0.0)   | 55 (33.5) | 13 (7.9) |
| Ready-to-eat Food (n=38)                     | NOVA4 (n=38)  | 7 (18.4)  | 6 (15.8)   | 11 (28.9) | 7 (18.4)  | 6 (15.8)   | 6 (15.8)  | 10 (26.3) | 11 (28.9) | 6 (15.8) | 14 (36.8) | 5 (13.2) | 10 (26.3) | 24 (63.2) | 0 (0.0)  |
| Frozen, Semi-Ready Meal (n=40)               | NOVA4 (n=40)  | 3 (7.5)   | 1 (2.5)    | 0 (0.0)   | 5 (12.5)  | 0 (0.0)    | 0 (0.0)   | 5 (12.5)  | 4 (10.0)  | 5 (12.5) | 0 (0.0)   | 0 (0.0)  | 3 (7.5)   | 8 (20.0)  | 0 (0.0)  |
